# Supplementary material for: Coordination anion effects on the geometry and magnetic interaction of binuclear Dy2 single-molecule magnets
Source: Royal Society of Chemistry journal article supplement (doi:10.1039/d1dt02071d), 2021-01-01
Supplement: d1dt02071d1.pdf [file d1dt02071d1.pdf]

## Supporting Information

### Coordination anion effects on the geometry and magnetic interaction of binuclear Dy<sub>2</sub> single-molecule magnets

Jinjiang Wu<sup>a,b</sup>, Xiao-Lei Li<sup>a</sup>, Léo La Droitte,<sup>c</sup> Olivier Cador,<sup>c</sup> Boris Le Guennic,<sup>c\*</sup>  
and Jinkui Tang<sup>a,b\*</sup>

<sup>a</sup>*State Key Laboratory of Rare Earth Resource Utilization, Changchun Institute of Applied Chemistry, Chinese Academy of Sciences, Changchun, 130022, P. R. China.*

<sup>b</sup>*School of Applied Chemistry and Engineering, University of Science and Technology of China, Hefei 230026, P. R. China.*

<sup>c</sup>*Univ Rennes, CNRS, ISCR (Institut des Sciences Chimiques de Rennes) - UMR 6226, F-35000 Rennes, France.*

*Corresponding Author:*

Boris Le Guennic, *E-mail:* [boris.leguennic@univ-rennes1.fr](mailto:boris.leguennic@univ-rennes1.fr)

Jinkui Tang, *E-mail:* [tang@ciac.ac.cn](mailto:tang@ciac.ac.cn)

**Table S1.** Crystallographic data for complexes **1** and **2**.

| Compound                                                                        | <b>1</b>                                                                                      | <b>2</b>                                                                        |
|---------------------------------------------------------------------------------|-----------------------------------------------------------------------------------------------|---------------------------------------------------------------------------------|
| Formula                                                                         | C <sub>76</sub> H <sub>74</sub> Dy <sub>2</sub> N <sub>12</sub> O <sub>6</sub> S <sub>2</sub> | C <sub>74</sub> H <sub>74</sub> Dy <sub>2</sub> N <sub>12</sub> O <sub>14</sub> |
| Mr                                                                              | 1640.59                                                                                       | 1680.45                                                                         |
| Temperature/K                                                                   | 173.0                                                                                         | 173.0                                                                           |
| Crystal system                                                                  | Triclinic                                                                                     | Monoclinic                                                                      |
| Space group                                                                     | <i>P</i> $\bar{1}$                                                                            | <i>P</i> 2 <sub>1</sub> / <i>n</i>                                              |
| <i>a</i> /Å                                                                     | 11.6924(4)                                                                                    | 14.6039(9)                                                                      |
| <i>b</i> /Å                                                                     | 12.8898(4)                                                                                    | 15.8167(9)                                                                      |
| <i>c</i> /Å                                                                     | 13.8753(4)                                                                                    | 16.5425(10)                                                                     |
| $\alpha$ /°                                                                     | 96.547(1)                                                                                     | 90                                                                              |
| $\beta$ /°                                                                      | 100.241(1)                                                                                    | 107.585(2)                                                                      |
| $\gamma$ /°                                                                     | 113.931(1)                                                                                    | 90                                                                              |
| Volume/Å <sup>3</sup>                                                           | 1840.2(5)                                                                                     | 3642.5(4)                                                                       |
| <i>Z</i>                                                                        | 1                                                                                             | 2                                                                               |
| $\rho_{\text{calc}}/\text{g}\cdot\text{cm}^{-3}$                                | 1.480                                                                                         | 1.532                                                                           |
| <i>F</i> (000)                                                                  | 826.0                                                                                         | 1692.0                                                                          |
| Crystal size/mm <sup>3</sup>                                                    | 0.12×0.24×0.25                                                                                | 0.6×0.4×0.2                                                                     |
| Reflns collected                                                                | 20505                                                                                         | 74904                                                                           |
| <i>R</i> <sub>int</sub>                                                         | 0.0563                                                                                        | 0.0485                                                                          |
| GOF on <i>F</i> <sup>2</sup>                                                    | 1.072                                                                                         | 1.151                                                                           |
| * <i>R</i> <sub>1</sub> , <i>wR</i> <sub>2</sub> [ <i>I</i> > = 2σ( <i>I</i> )] | 0.0552, 0.1539                                                                                | 0.0227, 0.0521                                                                  |
| * <i>R</i> <sub>1</sub> , <i>wR</i> <sub>2</sub> [all data]                     | 0.0597, 0.1595                                                                                | 0.0284, 0.0561                                                                  |
| CCDC                                                                            | 2088272                                                                                       | 2088273                                                                         |

\**R*<sub>1</sub> =  $\sum ||F_o| - |F_c|| / \sum |F_o|$  for *F*<sub>o</sub> > 2s(*F*<sub>o</sub>); *wR*<sub>2</sub> =  $(\sum w(F_o^2 - F_c^2)^2 / \sum (wF_c^2)^2)^{1/2}$  all reflections, *w* =  $1/[s^2(F_o^2) + (0.1557P)^2]$  where *P* =  $(F_o^2 + 2F_c^2)/3$

**Table S2.** Selected bond distances (Å), angles (°) for complexes **1** and **2**.

|                                | Compound  |           |
|--------------------------------|-----------|-----------|
|                                | <b>1</b>  | <b>2</b>  |
| Dy(1)–O(1)                     | 2.286(3)  | 2.289(0)  |
| Dy(1)–O(1a)                    | 2.345(1)  | 2.301(6)  |
| Dy(1)–O(2)                     | 2.187(7)  | 2.219(6)  |
| Dy(1)–O(3)                     | 2.214(0)  | 2.212(5)  |
| Dy(1)–O <sub>nitrate</sub>     |           | 2.212(5)  |
|                                |           | 2.668(8)  |
| Dy(1)–N(1)                     | 2.623(0)  | 2.546(0)  |
| Dy(1)–N(2)                     | 2.529(7)  | 2.730(7)  |
| Dy(1)–N <sub>thiocyanate</sub> | 2.425(6)  |           |
| Dy···Dy                        | 3.7441(6) | 3.7522(5) |
| Dy(1)–O(1)–Dy(1a)              | 107.8(7)  | 109.6(4)  |
| Dy–O <sub>average</sub>        | 2.258(0)  | 2.353(5)  |
| Dy–N <sub>average</sub>        | 2.525(6)  | 2.638(0)  |

**Table S3.** Lanthanide geometry analysis by SHAPE software for **1** and **2**.

| Central atom | Coordination Polyhedron                                    | CShM Values  |
|--------------|------------------------------------------------------------|--------------|
| <b>1</b> Dy1 | Hexagonal pyramid (HPY-7, C <sub>6v</sub> )                | 18.645       |
|              | Pentagonal bipyramid (PBPY-7, D <sub>5h</sub> )            | 6.918        |
|              | <b>Capped octahedron (COC-7, C<sub>3v</sub>)</b>           | <b>0.935</b> |
|              | Capped trigonal prism (CTPR-7, C <sub>2v</sub> )           | 1,247        |
|              | Johnson pentagonal bipyramid J13 (JPBPY, D <sub>5h</sub> ) | 9.275        |
| <b>2</b> Dy1 | Hexagonal bipyramid (HBPY-8, D <sub>6h</sub> )             | 14.052       |
|              | Cube (CU-8, Oh)                                            | 9.788        |
|              | Square antiprism (SAPR-8, D <sub>4d</sub> )                | 3.368        |
|              | <b>Triangular dodecahedron (TDD-8, D<sub>2d</sub>)</b>     | <b>2.752</b> |
|              | Johnson gyrobifastigium J26 (JGBF-8, D <sub>2d</sub> )     | 13.062       |

**Table S4.** Computed energy levels (the ground state is set at zero), composition of the  $g$ -tensor ( $g_x, g_y, g_z$ ) and the main components ( $>10\%$ ) of the wavefunction for each  $m_j$  state of the ground-state multiplet  ${}^6H_{15/2}$  of individual  $Dy^{III}$  center for **1**.

| <b>KD</b> | <b>Energy<br/>(<math>cm^{-1}</math>)</b> | <b><math>g</math></b> |     |      | <b>Wavefunction</b>                                                                                                              |
|-----------|------------------------------------------|-----------------------|-----|------|----------------------------------------------------------------------------------------------------------------------------------|
| <b>1</b>  | 0.0                                      | 0.0                   | 0.0 | 19.8 | 98.1% $ \pm 15/2\rangle$                                                                                                         |
| <b>2</b>  | 249.0                                    | 0.1                   | 0.1 | 16.7 | 92.9% $ \pm 13/2\rangle$                                                                                                         |
| <b>3</b>  | 404.8                                    | 1.0                   | 1.6 | 12.6 | 68.1% $ \pm 11/2\rangle$ + 14.7% $ \pm 5/2\rangle$ + 10.7% $ \pm 7/2\rangle$                                                     |
| <b>4</b>  | 461.4                                    | 9.2                   | 7.2 | 2.8  | 45.1% $ \pm 3/2\rangle$ + 22.4% $ \pm 1/2\rangle$ + 15.1% $ \pm 9/2\rangle$                                                      |
| <b>5</b>  | 508.5                                    | 2.3                   | 4.4 | 11.3 | 26.8% $ \pm 7/2\rangle$ + 19.8% $ \pm 9/2\rangle$ + 19.7% $ \pm 1/2\rangle$ + 14.8% $ \pm 11/2\rangle$ + 14.7% $ \pm 5/2\rangle$ |
| <b>6</b>  | 530.3                                    | 3.0                   | 5.6 | 9.1  | 37.6% $ \pm 9/2\rangle$ + 26.5% $ \pm 5/2\rangle$ + 15.0% $ \pm 1/2\rangle$                                                      |
| <b>7</b>  | 566.3                                    | 1.5                   | 3.6 | 12.6 | 32.7% $ \pm 7/2\rangle$ + 22.7% $ \pm 1/2\rangle$ + 19.4% $ \pm 3/2\rangle$ + 16.5% $ \pm 9/2\rangle$                            |
| <b>8</b>  | 726.5                                    | 0.0                   | 0.0 | 19.3 | 31.1% $ \pm 5/2\rangle$ + 25.7% $ \pm 3/2\rangle$ + 20.4% $ \pm 7/2\rangle$ + 16.3% $ \pm 1/2\rangle$                            |

**Table S5.** Computed energy levels (the ground state is set at zero), composition of the  $g$ -tensor ( $g_x, g_y, g_z$ ) and the main components ( $> 10\%$ ) of the wavefunction for each  $m_j$  state of the ground-state multiplet  ${}^6H_{15/2}$  of individual  $Dy^{III}$  center for **2**.

| <b>KD</b> | <b>Energy<br/>(<math>cm^{-1}</math>)</b> | <b><math>g</math></b> |     |      | <b>Wavefunction</b>                                                                                                                            |
|-----------|------------------------------------------|-----------------------|-----|------|------------------------------------------------------------------------------------------------------------------------------------------------|
| <b>1</b>  | 0.0                                      | 0.0                   | 0.0 | 19.7 | 97.3 $\pm 15/2\rangle$                                                                                                                         |
| <b>2</b>  | 172.5                                    | 0.3                   | 0.8 | 15.0 | 72.2 $\pm 13/2\rangle$                                                                                                                         |
| <b>3</b>  | 238.1                                    | 0.8                   | 1.8 | 11.1 | 39.3 $\pm 11/2\rangle$ + 19.6 $\pm 3/2\rangle$ + 11.8 $\pm 7/2\rangle$ + 10.9 $\pm 1/2\rangle$                                                 |
| <b>4</b>  | 293.4                                    | 1.9                   | 4.0 | 11.0 | 27.0 $\pm 9/2\rangle$ + 19.6 $\pm 7/2\rangle$ + 17.0 $\pm 5/2\rangle$ + 11.5 $\pm 1/2\rangle$ + 10.8 $\pm 11/2\rangle$                         |
| <b>5</b>  | 330.9                                    | 2.5                   | 6.2 | 11.7 | 30.0 $\pm 1/2\rangle$ + 20.2 $\pm 3/2\rangle$ + 15.3 $\pm 5/2\rangle$ + 14.6 $\pm 11/2\rangle$                                                 |
| <b>6</b>  | 430.1                                    | 0.2                   | 1.2 | 15.3 | 20.4 $\pm 9/2\rangle$ + 18.6 $\pm 11/2\rangle$ + 18.2 $\pm 3/2\rangle$ + 12.5 $\pm 7/2\rangle$ + 12.5 $\pm 5/2\rangle$ + 12.5 $\pm 1/2\rangle$ |
| <b>7</b>  | 525.6                                    | 0.7                   | 1.2 | 15.4 | 24.5 $\pm 1/2\rangle$ + 24.0 $\pm 7/2\rangle$ + 17.9 $\pm 9/2\rangle$ + 11.0 $\pm 5/2\rangle$ + 10.5 $\pm 3/2\rangle$ + 10.3 $\pm 11/2\rangle$ |
| <b>8</b>  | 558.8                                    | 0.4                   | 2.0 | 17.0 | 29.5 $\pm 5/2\rangle$ + 22.3 $\pm 3/2\rangle$ + 20.0 $\pm 7/2\rangle$ + 14.1 $\pm 9/2\rangle$                                                  |

**Table S6.** Computed exchange energy levels (the ground state is set at zero), composition of the  $g$ -tensor ( $g_x, g_y, g_z$ ) and tunnelling splitting value for **1**.

| Energy (cm <sup>-1</sup> ) | $g$ |     |      | Tunneling splitting (cm <sup>-1</sup> ) |
|----------------------------|-----|-----|------|-----------------------------------------|
| 0.00                       | 0.0 | 0.0 | 39.5 | $7.6 \times 10^{-9}$                    |
| 0.49                       | 0.0 | 0.0 | 0.0  | $3.31 \times 10^{-8}$                   |

**Table S7.** Computed exchange energy levels (the ground state is set at zero), composition of the  $g$ -tensor ( $g_x, g_y, g_z$ ) and tunnelling splitting value for **2**.

| Energy (cm <sup>-1</sup> ) | $g$ |     |      | Tunneling splitting (cm <sup>-1</sup> ) |
|----------------------------|-----|-----|------|-----------------------------------------|
| 0.00                       | 0.0 | 0.0 | 0.0  | $2.46 \times 10^{-6}$                   |
| 2.83                       | 0.0 | 0.0 | 39.3 | $4.01 \times 10^{-6}$                   |

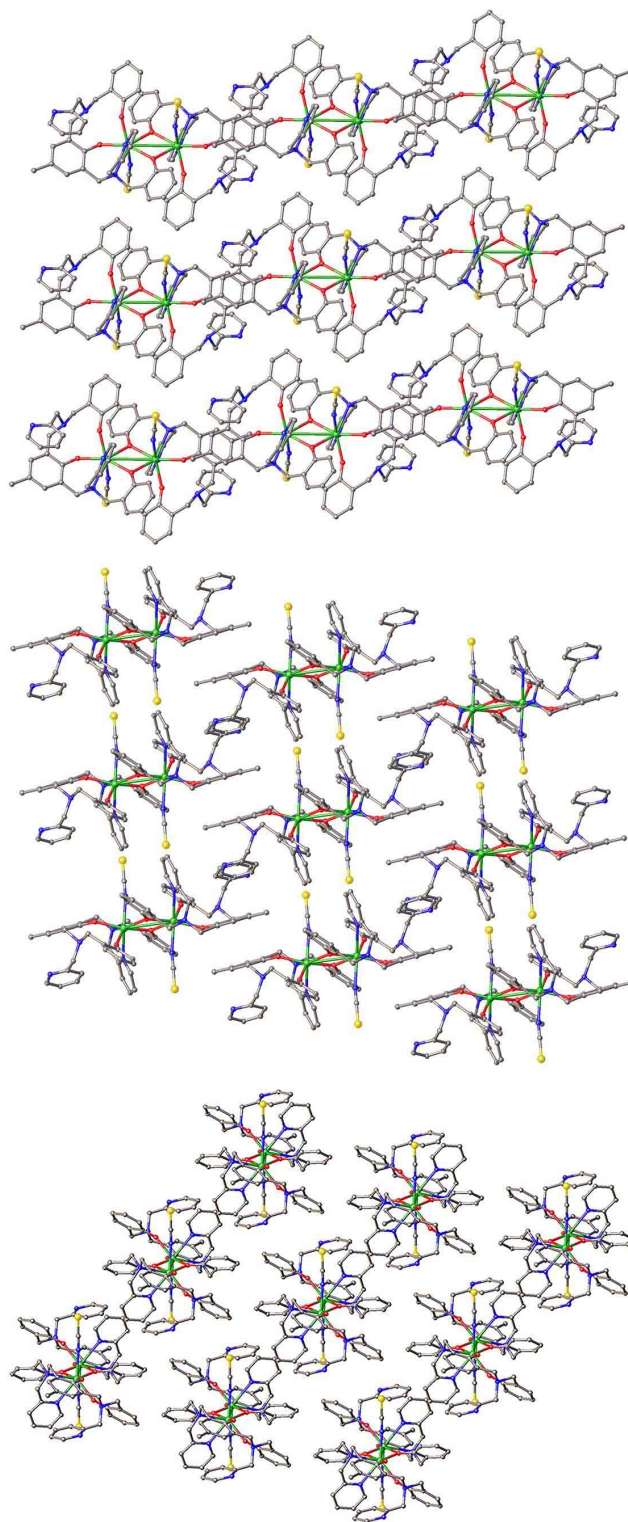

**Figure S1.** Packing arrangement along the crystallographic *a* (top), *b* (middle) and *c* (bottom) axis for **1**. Color code: purple, Dy; red, O; blue, N; gray, C; yellow, S.

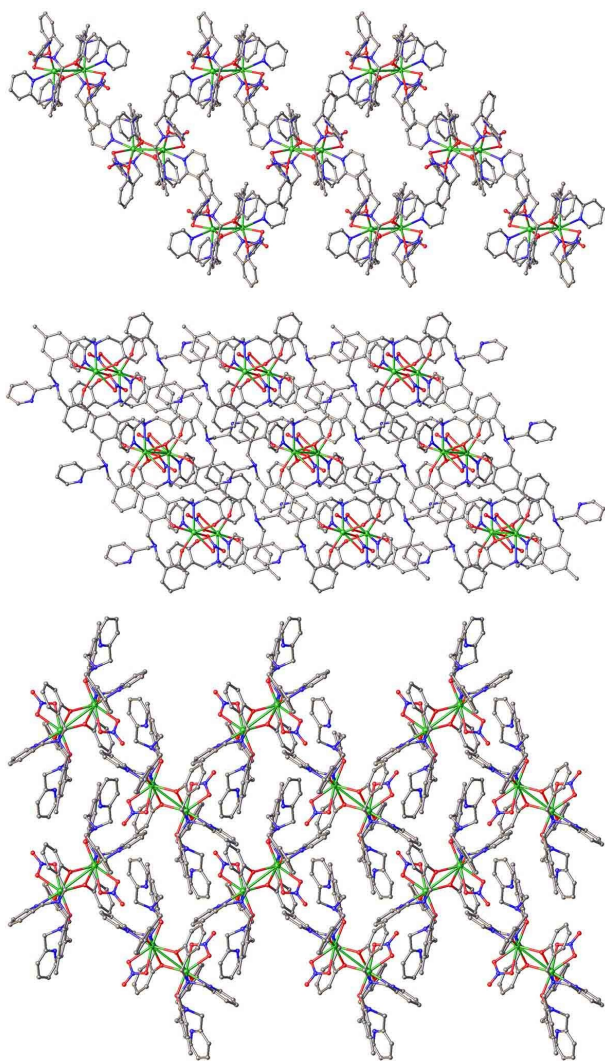

**Figure S2.** Packing arrangement along the crystallographic a (top), b (middle) and c (bottom) axis for **2**. Color code: purple, Dy; red, O; blue, N; gray, C.

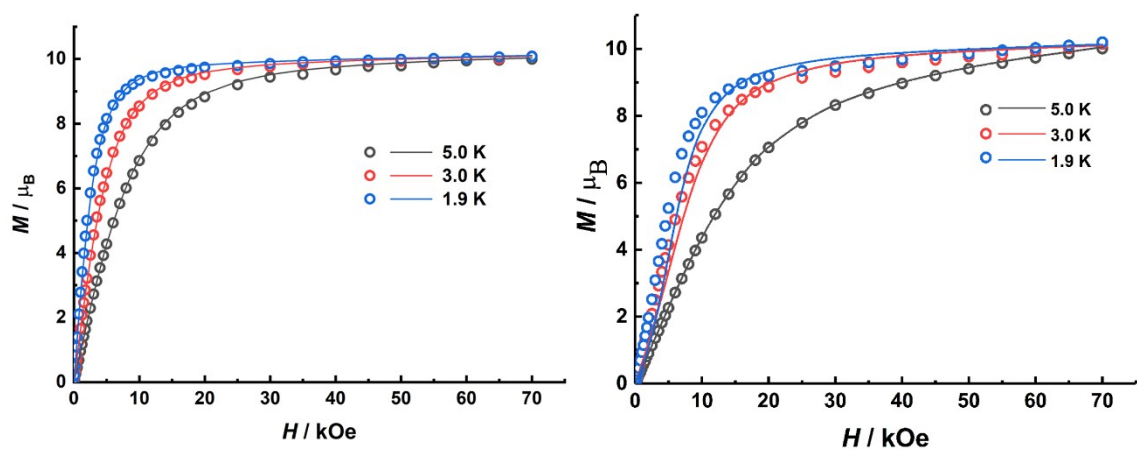

**Figure S3.** Field dependences of magnetization in the field range 0–70 kOe and at the range of 1.9–5.0 K for **1** (left) and **2** (right). Experimental values as empty dots while calculated curves are represented as full lines.

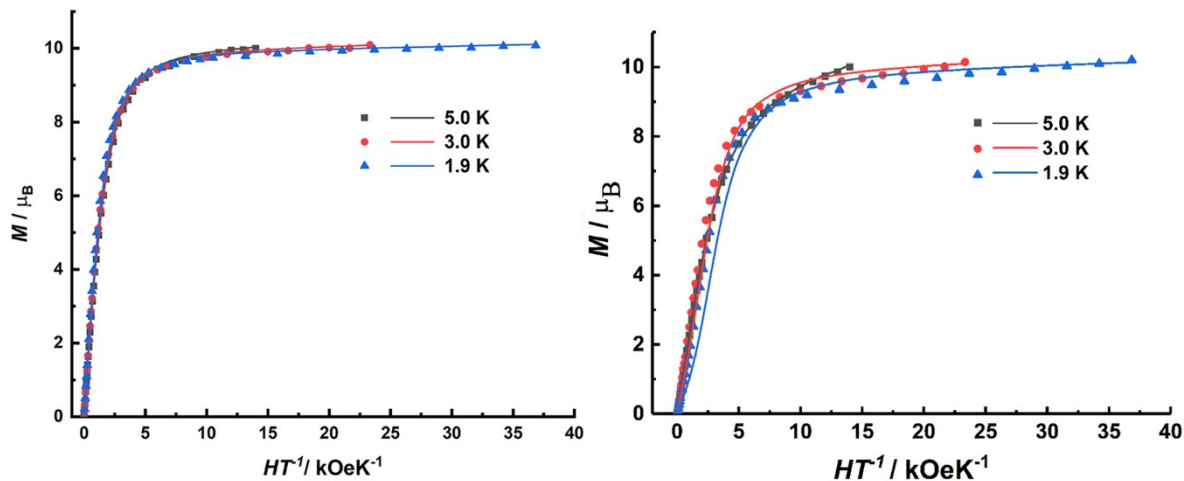

**Figure S4.** Plots of the reduced magnetization  $M$  versus  $H/T$  for **1** (left) and **2** (right). Experimental values as symbols while calculated curves are represented as full lines.

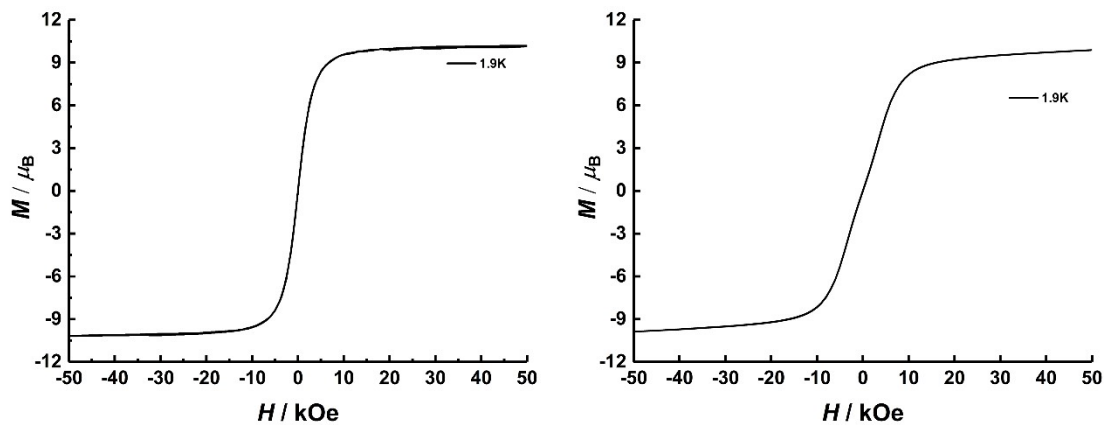

**Figure S5.** Variable magnetic field magnetization measurement for **1** (left) and **2** (right) at 1.9 K with an averaged sweep rate of 27 Oe/s.

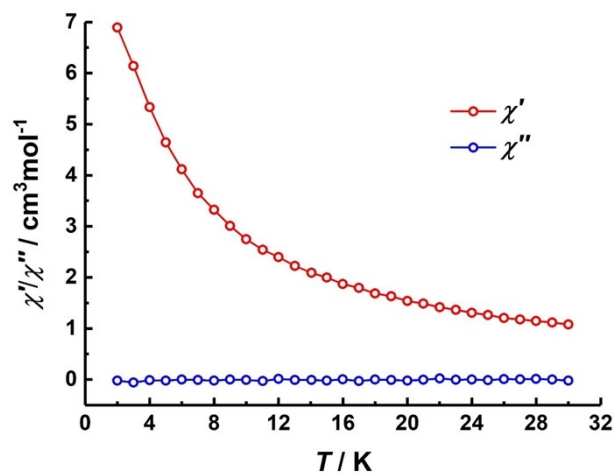

**Figure S6.** Temperature dependence under zero dc field of the in-phase (red) and the out-of-phase (blue) ac susceptibility component at 997 Hz for **2**.



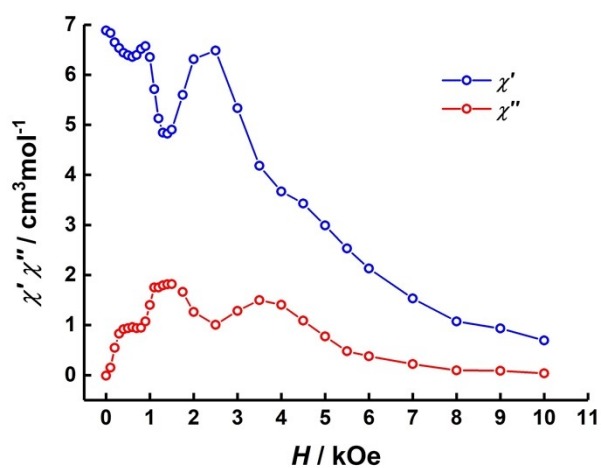

**Figure S7.** Field dependence of the in-phase (red) and the in-phase (blue) ac susceptibility component at 1.9 K and 997 Hz for **2**.

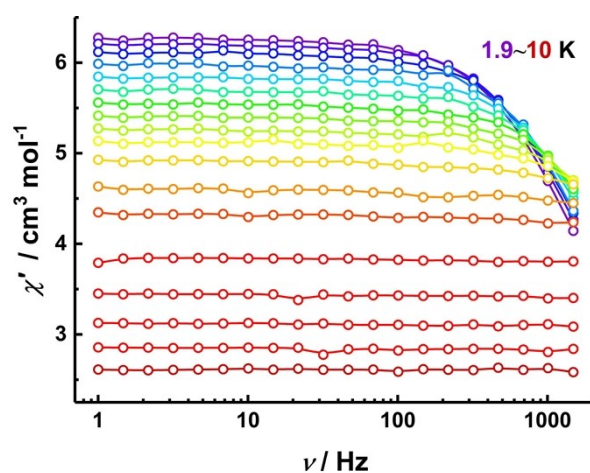

**Figure S8.** Frequency dependence of the out-of-phase ac susceptibility component under a 1100 Oe applied dc field for **2**.

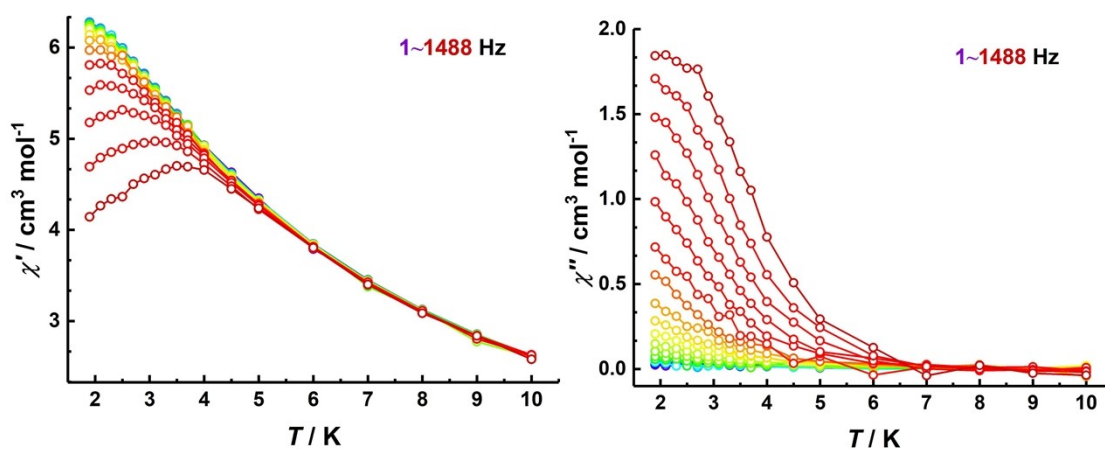

**Figure S9.** Frequency dependence of the in-phase (left) and out-of-phase (right) ac susceptibility component under a 1100 Oe applied dc field for **2**.

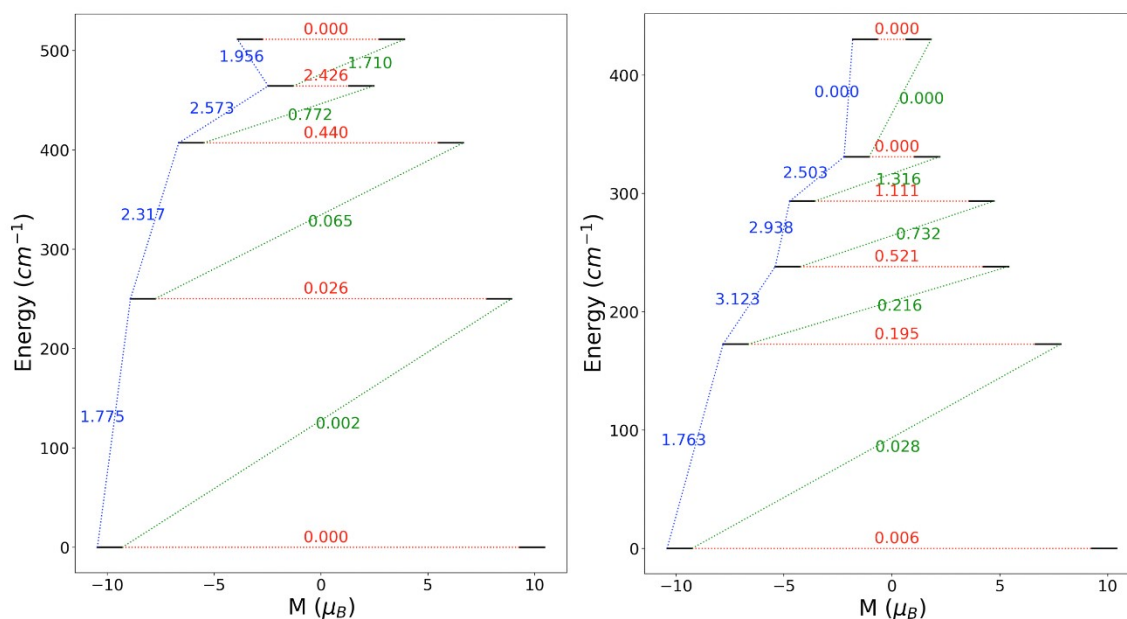

**Figure S10.** Energies (in  $\text{cm}^{-1}$ ) and projected  $\mu_Z$  (in  $\mu_B$ ) values along the ground magnetic axis for individual  $\text{Dy}^{\text{III}}$  in complexes **1** (left) and **2** (right). Black lines represent the eight Kramer doublets of individual  $\text{Dy}^{\text{III}}$ . The values of the magnetic (i.e. isotropic Zeeman) transition moments between the states are given for comparison. The values in red correspond to QTM (for the GS) and TA-QTM (for the ESs) mechanisms of the magnetization relaxation, whereas blue and green values correspond to Orbach mechanisms.

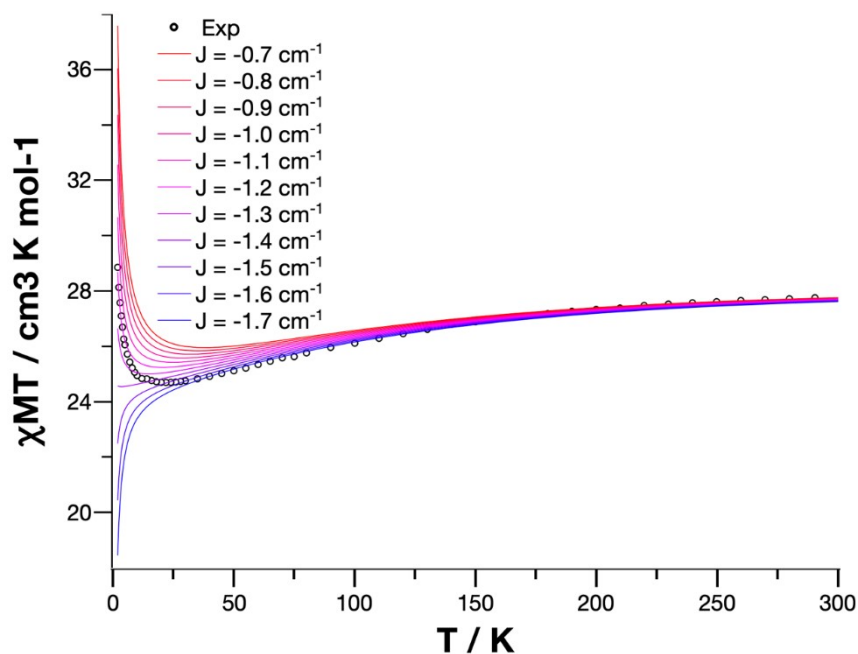

**Figure S11.** Temperature dependent  $\chi_M T$  values for **1** in dots with the calculated curves in full lines for a screening of the  $J_{\text{exch}}$  value from  $-0.7 \text{ cm}^{-1}$  to  $-1.7 \text{ cm}^{-1}$ .

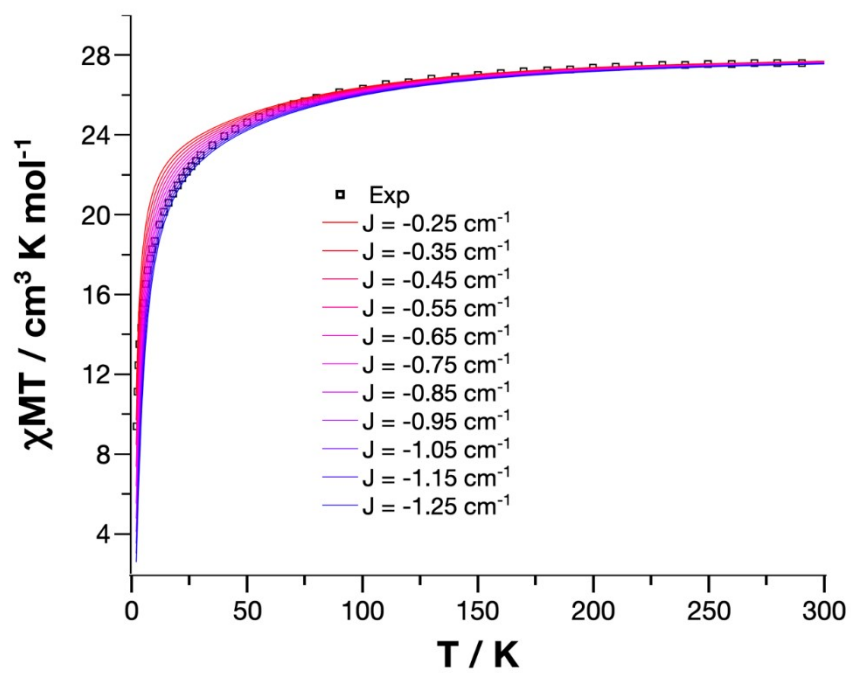

**Figure S12.** Temperature dependent  $\chi_{\text{M}}T$  values for **2** in squares with the calculated curves in full lines for a screening of the  $J_{\text{exch}}$  value from  $-0.25 \text{ cm}^{-1}$  to  $-1.25 \text{ cm}^{-1}$ .
